# Supplementary material
Source: PubMed Central journal article supplement (PMC10312234)
Supplement: PEDS_2022060951SupplementaryData.pdf [file PEDS_2022060951SupplementaryData.pdf]

## Supplemental Information

| <b>SUPPLEMENTAL TABLE 4</b> CRCS Items Used to Construct PCE Category Binary Indicators |                                                                                                                                                                                                                                                                                                                                                                                                                                                                                                                       |                                                                                                                                                   |
|-----------------------------------------------------------------------------------------|-----------------------------------------------------------------------------------------------------------------------------------------------------------------------------------------------------------------------------------------------------------------------------------------------------------------------------------------------------------------------------------------------------------------------------------------------------------------------------------------------------------------------|---------------------------------------------------------------------------------------------------------------------------------------------------|
| <b>Category</b>                                                                         | <b>Item Language</b>                                                                                                                                                                                                                                                                                                                                                                                                                                                                                                  | <b>Approach to Measure</b>                                                                                                                        |
| Able to confide in parents                                                              | <ol style="list-style-type: none"> <li>1. Before you were age 17 y, how much could you confide in your mother about things that were bothering you?</li> <li>2. Before you were age 17 y, how much could you confide in your father about things that were bothering you?</li> </ol>                                                                                                                                                                                                                                  | A score of "a lot" or "some" for either question led to this category being coded as positive.<br>Options: A lot/some/a little/not at all         |
| Parents understood their problems                                                       | <ol style="list-style-type: none"> <li>1. Before you were age 17 y, how did your (mother/stepmother/the woman who raised you) understand your problems and worries?</li> <li>2. Before you were age 17 y, how much did your (father/stepfather/the man who raised you) understand your problems and worries?</li> </ol>                                                                                                                                                                                               | A score of a lot or some for either question led this category to being coded as positive.<br>Options: A lot/some/a little/not at all             |
| Positive relationship with their parents                                                | <ol style="list-style-type: none"> <li>1. Before you were age 17 y, how would you rate your relationship with (your mother/your stepmother/the woman who raised you)?</li> <li>2. Before you were age 17 y, how would you rate your relationship with (your father/your stepfather/the man who raised you)?</li> </ol>                                                                                                                                                                                                | A score of excellent or very good on either question led to this category being coded as positive.<br>Options: Excellent/very good/good/fair/poor |
| Happy at school                                                                         | <ol style="list-style-type: none"> <li>1. When you were between age ages 6 and 12 y, how often did you feel happy at school?</li> <li>2. When you were between ages 13 and 16 y, how often did you feel happy at school?</li> </ol>                                                                                                                                                                                                                                                                                   | A score of a lot on both questions led to this category being coded as positive.<br>Options: A lot/sometimes/rarely/never                         |
| Comfortable around a group of friends                                                   | <ol style="list-style-type: none"> <li>1. When you were between ages 6 and 12 y, how often did you have a group of friends you felt comfortable spending time with?</li> <li>2. When you were between ages 13 and 17 y, how often did you have a group of friends you felt comfortable spending time with?</li> </ol>                                                                                                                                                                                                 | A score of often on both questions led this category to being coded as positive.<br>Options: Often/sometimes/not very often/never                 |
| Neighborhood support                                                                    | <ol style="list-style-type: none"> <li>1. Think back to the neighborhood in which you lived the longest when you were between ages 6 and 12 y. How true is the following statement about this neighborhood?<br/>"My neighbors were willing to help each other out."</li> <li>2. Think back to the neighborhood in which you lived the longest when you were between ages 13 and 16 y. How true is the following statement about this neighborhood?<br/>"My neighbors were willing to help each other out."</li> </ol> | A score of "very true" on both questions led to this category being coded as positive.<br>Options: Very true/somewhat true                        |

| <b>SUPPLEMENTAL TABLE 5</b> Distribution of Individual Domains Within PCE Score |                   |
|---------------------------------------------------------------------------------|-------------------|
| <b>Category</b>                                                                 | <b>Percentage</b> |
| Able to confide in parents                                                      | 75.6              |
| Parents understood their problems                                               | 83.4              |
| Positive relationship with their parents                                        | 77.9              |
| Happy at school                                                                 | 47.0              |
| Comfortable around a group of friends                                           | 81.2              |
| Neighborhood support                                                            | 64.0              |

**SUPPLEMENTAL TABLE 6** Panel Study of Income Dynamics Questionnaire Items Used to Construct Adult Health Outcomes: Diagnosis

| Category                                      | Item Language                                                                                                                    | Approach to Measuring Diagnosis                                                                                                                                                                                |
|-----------------------------------------------|----------------------------------------------------------------------------------------------------------------------------------|----------------------------------------------------------------------------------------------------------------------------------------------------------------------------------------------------------------|
| Overall health status: Fair/poor              | Would you say your health in general is excellent, very good, good, fair, or poor?                                               | A score of fair or poor led to this category being coded as positive.                                                                                                                                          |
| Physical health outcomes                      |                                                                                                                                  |                                                                                                                                                                                                                |
| Asthma                                        | Has a doctor or other health professional ever told you that you had asthma?                                                     | A score of "yes" led to this category being coded as positive.                                                                                                                                                 |
| Hypertension                                  | Has a doctor or other health professional ever told you that you had high blood pressure or hypertension?                        | A score of yes led to this category being coded as positive.                                                                                                                                                   |
| Diabetes                                      | Has a doctor or other health professional ever told you that you had diabetes?                                                   | A score of yes led to this category being coded as positive.                                                                                                                                                   |
| Coronary heart disease, angina, heart failure | Has a doctor or other health professional ever told you that you had coronary heart disease, angina, congestive heart failure?   | A score of yes led to this category being coded as positive.                                                                                                                                                   |
| Heart attack                                  | Has a doctor or other health professional ever told you that you had a heart attack?                                             | A score of yes led to this category being coded as positive.                                                                                                                                                   |
| Stroke                                        | Has a doctor or other health professional ever told you that you had a stroke?                                                   | A score of yes led to this category being coded as positive.                                                                                                                                                   |
| Lung disease                                  | Has a doctor or other health professional ever told you that you had chronic lung disease such as bronchitis or emphysema?       | A score of yes led to this category being coded as positive.                                                                                                                                                   |
| Cancer                                        | Has a doctor or other health professional ever told you that you had cancer or a malignant tumor?                                | A score of yes led to this category being coded as positive.                                                                                                                                                   |
| Arthritis                                     | Has a doctor or other health professional ever told you that you had arthritis or rheumatism?                                    | A score of yes led to this category being coded as positive.                                                                                                                                                   |
| Memory loss                                   | Has a doctor or other health professional ever told you that you had permanent loss of memory or mental ability?                 | A score of yes led to this category being coded as positive.                                                                                                                                                   |
| Any physical illness                          | See above for asthma, hypertension, diabetes, cardiovascular disease, heart attack, stroke, lung disease, cancer, and arthritis. | This category was coded as positive if the respondent indicated yes to any of the following: asthma, hypertension, diabetes, cardiovascular disease, heart attack, stroke, lung disease, cancer, or arthritis. |
| Any cardiovascular condition                  | See above for hypertension, cardiovascular disease, stroke, and heart attack.                                                    | This category was coded as positive if the respondent indicated yes to any of the following: hypertension, cardiovascular disease, stroke, or heart attack.                                                    |
| Mental health outcomes                        |                                                                                                                                  |                                                                                                                                                                                                                |
| Any psychiatric problem                       | Has a doctor or other health professional ever told you that you had any emotional, nervous, or psychiatric problem?             | A score of yes led to this category being coded as positive.                                                                                                                                                   |
| Anxiety                                       | What was the diagnosis? What is the emotional/psychiatric disorder?                                                              | A response of "anxiety (panic)" during mentions 1, 2, or 3 led to this category being coded as positive.                                                                                                       |
| Depression                                    | What was the diagnosis? What is the emotional/psychiatric disorder?                                                              | A response of depression during mentions 1, 2, or 3 led to this category being coded as positive.                                                                                                              |
| Bipolar depression                            | What was the diagnosis? What is the emotional/psychiatric disorder?                                                              | A response of "bipolar disorder" during mentions 1, 2, or 3 led to this category being coded as positive.                                                                                                      |

| <b>SUPPLEMENTAL TABLE 7</b> Panel Study of Income Dynamics Questionnaire Items Used to Construct Adult Health Outcomes: Age at Diagnosis |                                                                                                                     |                                                                                                                                                                                                                                                                                       |
|------------------------------------------------------------------------------------------------------------------------------------------|---------------------------------------------------------------------------------------------------------------------|---------------------------------------------------------------------------------------------------------------------------------------------------------------------------------------------------------------------------------------------------------------------------------------|
| <b>Category</b>                                                                                                                          | <b>Item Language</b>                                                                                                | <b>Approach to Measuring Diagnosis</b>                                                                                                                                                                                                                                                |
| Asthma                                                                                                                                   | How old were you when you were first diagnosed with asthma?                                                         | Response was used.                                                                                                                                                                                                                                                                    |
| Hypertension                                                                                                                             | How old were you when you were first diagnosed with high blood pressure or hypertension?                            | Response was used.                                                                                                                                                                                                                                                                    |
| Diabetes                                                                                                                                 | How old were you when you were first diagnosed with diabetes?                                                       | Response was used.                                                                                                                                                                                                                                                                    |
| Coronary heart disease, angina, heart failure                                                                                            | How old were you when you were first diagnosed with this condition (coronary heart disease, angina, heart failure)? | Response was used.                                                                                                                                                                                                                                                                    |
| Heart attack                                                                                                                             | How old were you the first time you had a heart attack?                                                             | Response was used.                                                                                                                                                                                                                                                                    |
| Stroke                                                                                                                                   | How old were you the first time you had a stroke?                                                                   | Response was used.                                                                                                                                                                                                                                                                    |
| Lung disease                                                                                                                             | How old were you when you were first diagnosed with (lung disease/bronchitis/emphysema)?                            | Response was used.                                                                                                                                                                                                                                                                    |
| Cancer                                                                                                                                   | How old were you when you were first diagnosed with cancer?                                                         | Response was used.                                                                                                                                                                                                                                                                    |
| Arthritis                                                                                                                                | How old were you when you were first diagnosed with arthritis/rheumatism?                                           | Response was used.                                                                                                                                                                                                                                                                    |
| Memory loss                                                                                                                              | How old were you when you were first diagnosed with (loss of memory/mental ability)?                                | Response was used.                                                                                                                                                                                                                                                                    |
| Any physical illness                                                                                                                     | See above.                                                                                                          | This category was coded with the smallest value for age at diagnosis for the following conditions: hypertension, diabetes, cardiovascular disease, heart attack, stroke, lung disease, cancer, or arthritis. Of note, we only considered asthma if it was diagnosed at 18 y or older. |
| Any cardiovascular condition                                                                                                             | See above for hypertension, cardiovascular disease, stroke, and heart attack.                                       | This category was coded with the smallest value for age at diagnosis for the following conditions: hypertension, cardiovascular disease, stroke, or heart attack.                                                                                                                     |
| Mental health outcomes                                                                                                                   |                                                                                                                     |                                                                                                                                                                                                                                                                                       |
| Any psychiatric problem                                                                                                                  | How old were you when you were first diagnosed?                                                                     | Response was used.                                                                                                                                                                                                                                                                    |

| <b>SUPPLEMENTAL TABLE 8</b> Frequency of Adult Health Outcomes by PCEs |                               |      |       |       |       |       |
|------------------------------------------------------------------------|-------------------------------|------|-------|-------|-------|-------|
| Outcome                                                                | Response                      | N    | Total | PCEs  |       |       |
|                                                                        |                               |      |       | 0–2   | 3–4   | 5–6   |
| Self-reported health                                                   | Excellent, very good, or good | 6545 | 87.4% | 84.2% | 86.0% | 89.4% |
|                                                                        | Fair or poor                  | 870  | 12.6% | 15.8% | 14.0% | 10.6% |
| Asthma                                                                 | No                            | 6514 | 88.4% | 84.1% | 86.9% | 90.7% |
|                                                                        | Yes                           | 894  | 11.6% | 15.9% | 13.1% | 9.3%  |
| Lung disease                                                           | No                            | 7007 | 94.1% | 92.7% | 94.2% | 94.5% |
|                                                                        | Yes                           | 400  | 5.9%  | 7.3%  | 5.8%  | 5.5%  |
| Diabetes                                                               | No                            | 6552 | 87.5% | 87.6% | 87.7% | 87.3% |
|                                                                        | Yes                           | 856  | 12.5% | 12.4% | 12.3% | 12.7% |
| Cardiovascular disease                                                 | No                            | 7044 | 94.2% | 95.9% | 94.2% | 93.7% |
|                                                                        | Yes                           | 362  | 5.8%  | 4.1%  | 5.8%  | 6.3%  |
| Hypertension                                                           | No                            | 4908 | 65.1% | 69.7% | 66.4% | 62.9% |
|                                                                        | Yes                           | 2499 | 34.9% | 30.3% | 33.6% | 37.2% |
| Heart attack                                                           | No                            | 7119 | 95.4% | 96.3% | 95.3% | 95.2% |
|                                                                        | Yes                           | 291  | 4.6%  | 3.7%  | 4.8%  | 4.8%  |
| Stroke                                                                 | No                            | 7161 | 96.5% | 95.6% | 97.7% | 96.0% |
|                                                                        | Yes                           | 248  | 3.5%  | 4.4%  | 2.3%  | 3.5%  |
| Cancer                                                                 | No                            | 6850 | 90.3% | 90.1% | 91.0% | 89.8% |
|                                                                        | Yes                           | 558  | 9.7%  | 9.9%  | 9.0%  | 10.2% |
| Any psychiatric problem                                                | No                            | 4171 | 86.0% | 75.6% | 84.9% | 90.0% |
|                                                                        | Yes                           | 585  | 14.0% | 24.4% | 15.1% | 10.0% |
| Anxiety                                                                | No                            | 6867 | 94.5% | 91.1% | 93.1% | 96.3% |
|                                                                        | Yes                           | 335  | 5.6%  | 8.9%  | 7.0%  | 3.7%  |
| Depression                                                             | No                            | 6785 | 93.6% | 89.1% | 92.7% | 95.5% |
|                                                                        | Yes                           | 417  | 6.4%  | 10.9% | 7.4%  | 4.5%  |
| Arthritis                                                              | No                            | 5887 | 76.3% | 73.6% | 76.7% | 76.9% |
|                                                                        | Yes                           | 1517 | 23.7% | 26.4% | 23.3% | 23.1% |

**SUPPLEMENTAL TABLE 9** Association Between PCE Score and Adult Physical Health Outcomes

|                                                  |             | PCEs, aRRRs (95% CI) |             |                      | ACEs, aRRRs (95% CI) |             |             |
|--------------------------------------------------|-------------|----------------------|-------------|----------------------|----------------------|-------------|-------------|
|                                                  |             | 5–6 PCEs             | 3–4 PCEs    | 0–2 PCEs (Reference) | 0 ACEs (Reference)   | 1–2 ACEs    | 3+ ACEs     |
| Asthma                                           | PCEs only   | 0.75**               | 0.94        | 1.00                 | —                    | —           | —           |
|                                                  | (n = 7175)  | (0.61–0.88)          | (0.78–1.11) | —                    | —                    | —           | —           |
|                                                  | ACEs + PCEs | 0.76*                | 0.90        | 1.00                 | 1.00                 | 1.25*       | 1.55***     |
|                                                  | (n = 6449)  | (0.59–0.94)          | (0.69–1.10) | —                    | —                    | (1.01–1.48) | (1.22–1.89) |
| Arthritis                                        | PCEs only   | 0.84**               | 0.97        | 1.00                 | —                    | —           | —           |
|                                                  | (n = 7170)  | (0.74–0.94)          | (0.84–1.09) | —                    | —                    | —           | —           |
|                                                  | ACEs + PCEs | 0.99                 | 1.07        | 1.00                 | 1.00                 | 1.11        | 1.38***     |
|                                                  | (n = 6445)  | (0.82–1.16)          | (0.88–1.26) | —                    | —                    | (0.98–1.25) | (1.18–1.58) |
| Hypertension                                     | PCEs only   | 1.10*                | 1.10        | 1.00                 | —                    | —           | —           |
|                                                  | (n = 7174)  | (1.00–1.20)          | (0.99–1.20) | —                    | —                    | —           | —           |
|                                                  | PCEs + ACEs | 1.07                 | 1.05        | 1.00                 | 1.00                 | 1.02        | 1.138       |
|                                                  | (n = 6449)  | (0.93–1.21)          | (0.91–1.20) | —                    | —                    | (0.93–1.10) | (1.02–1.26) |
| Diabetes                                         | PCEs only   | 0.93                 | 0.95        | 1.00                 | —                    | —           | —           |
|                                                  | (n = 7174)  | (0.76–1.10)          | (0.76–1.13) | —                    | —                    | —           | —           |
|                                                  | PCEs + ACEs | 1.02                 | 1.06        | 1.00                 | 1.00                 | 1.15        | 1.20        |
|                                                  | (n = 6448)  | (0.76–1.28)          | (0.78–1.34) | —                    | —                    | (0.95–1.35) | (0.94–1.47) |
| Coronary heart disease, angina, or heart failure | PCEs only   | 1.14                 | 1.21        | 1.00                 | —                    | —           | —           |
|                                                  | (n = 7173)  | (0.76–1.52)          | (0.78–1.63) | —                    | —                    | —           | —           |
|                                                  | PCEs + ACEs | 1.19                 | 1.15        | 1.00                 | 1.00                 | 1.15        | 1.36        |
|                                                  | (n = 6450)  | (0.67–1.72)          | (0.62–1.68) | —                    | —                    | (0.80–1.50) | (0.85–1.86) |
| Heart attack                                     | PCEs only   | 1.00                 | 1.08        | 1.00                 | —                    | —           | —           |
|                                                  | (n = 7176)  | (0.64–1.356)         | (0.67–1.49) | —                    | —                    | —           | —           |
|                                                  | PCEs + ACEs | 1.00                 | 0.97        | 1.00                 | 1.00                 | 1.26        | 1.76*       |
|                                                  | (n = 6450)  | (0.57–1.43)          | (0.53–1.41) | —                    | —                    | (0.94–1.69) | (1.04–2.48) |
| Stroke                                           | PCEs only   | 0.80                 | 0.65*       | 1.00                 | —                    | —           | —           |
|                                                  | (n = 7176)  | (0.53–1.07)          | (0.41–0.90) | —                    | —                    | —           | —           |
|                                                  | PCEs + ACEs | 0.74                 | 0.58*       | 1.00                 | 1.00                 | 1.06        | 1.08        |
|                                                  | (n = 6451)  | (0.41–1.06)          | (0.30–0.85) | —                    | —                    | (0.68–1.45) | (0.60–1.57) |
| Lung disease                                     | PCEs only   | 0.81                 | 0.90        | 1.00                 | —                    | —           | —           |
|                                                  | (n = 7175)  | (0.60–1.03)          | (0.65–1.15) | —                    | —                    | —           | —           |
|                                                  | PCEs + ACEs | 0.97                 | 0.97        | 1.00                 | 1.00                 | 1.31        | 1.73**      |
|                                                  | (n = 6449)  | (0.61–1.33)          | (0.60–1.34) | —                    | —                    | (0.92–1.71) | (1.14–2.31) |
| Cancer                                           | PCEs only   | 0.89                 | 0.88        | 1.00                 | —                    | —           | —           |
|                                                  | (n = 7174)  | (0.68–1.09)          | (0.66–1.10) | —                    | —                    | —           | —           |
|                                                  | PCEs + ACEs | 0.96                 | 0.96        | 1.00                 | 1.00                 | 1.05        | 1.10        |
|                                                  | (n = 6448)  | (0.66–1.26)          | (0.64–1.27) | —                    | —                    | (0.84–1.26) | (0.80–1.39) |
| Anxiety                                          | PCEs only   | 0.62**               | 0.92        | 1.00                 | —                    | —           | —           |
|                                                  | (n = 6970)  | (0.44–0.79)          | (0.66–1.18) | —                    | —                    | —           | —           |
|                                                  | ACEs + PCEs | 0.92                 | 1.22        | 1.00                 | 1.00                 | 1.51*       | 2.23***     |
|                                                  | (n = 6266)  | (0.60–1.3)           | (0.80–1.63) | —                    | —                    | (0.99–2.03) | (1.42–3.05) |
| Depression                                       | PCEs only   | 0.50***              | 0.71**      | 1.00                 | —                    | —           | —           |
|                                                  | (n = 6970)  | (0.38–0.62)          | (0.53–0.88) | —                    | —                    | —           | —           |
|                                                  | ACEs + PCEs | 0.63**               | 0.76        | 1.00                 | 1.00                 | 1.74***     | 2.43***     |
|                                                  | (n = 6266)  | (0.44–0.81)          | (0.54–0.97) | —                    | —                    | (1.18–2.31) | (1.59–3.28) |
| Any CV condition (CHD, HTN, MI, stroke)          | PCEs only   | 1.05                 | 1.06        | 1.00                 | —                    | —           | —           |
|                                                  | (n = 7177)  | (0.96–1.14)          | (0.97–1.16) | —                    | —                    | —           | —           |
|                                                  | PCEs + ACEs | 1.03                 | 1.02        | 1.00                 | 1.00                 | 1.03        | 1.15**      |
|                                                  | (n = 6461)  | (0.90–1.15)          | (0.89–1.15) | —                    | —                    | (0.95–1.11) | (1.04–1.27) |

The treatment model included continuous age, sex, a 5-category race/ethnicity measure, educational attainment, health insurance, and income as measured by percentage of federal poverty level. Statistical significance is indicated at the 5% level: \*  $P < .05$ ; \*\*  $P < .01$ ; \*\*\*  $P < .001$ . ACEs, adverse childhood experiences; aRRR, adjusted relative risk reduction; CHD, coronary heart disease; CV, cardiovascular; HTN, hypertension; MI, myocardial infarction; PCEs, positive childhood experiences.

| <b>SUPPLEMENTAL TABLE 10</b> Association Between PCEs and ACEs and Adult Health Outcomes: Interacted Model |                                       |             |                        |             |                           |             |
|------------------------------------------------------------------------------------------------------------|---------------------------------------|-------------|------------------------|-------------|---------------------------|-------------|
|                                                                                                            | Any Physical or Psychiatric Condition |             | Any Physical Condition |             | Any Psychiatric Condition |             |
|                                                                                                            | Coef.                                 | 95% CI      | Coef.                  | 95% CI      | Coef.                     | 95% CI      |
| PCE score                                                                                                  |                                       |             |                        |             |                           |             |
| 0–2 PCEs                                                                                                   | 1.00                                  | —           | 1.00                   | —           | 1.00                      | —           |
| 3–4 PCEs                                                                                                   | 0.56*                                 | (0.34–0.94) | 0.67                   | (0.40–1.12) | 0.60                      | (0.29–1.23) |
| 5–6 PCEs                                                                                                   | 0.44***                               | (0.27–0.71) | 0.52**                 | (0.32–0.84) | 0.33***                   | (0.16–0.65) |
| ACE score                                                                                                  |                                       |             |                        |             |                           |             |
| 0 ACEs                                                                                                     | 1.00                                  | —           | 1.00                   | —           | 1.00                      | —           |
| 1–2 ACEs                                                                                                   | 0.69                                  | (0.40–1.18) | 0.68                   | (0.39–1.16) | 0.96                      | (0.46–2.03) |
| 3+ ACEs                                                                                                    | 0.98                                  | (0.58–1.67) | 0.88                   | (0.52–1.48) | 1.97                      | (0.98–3.95) |
| PCE-by-ACE                                                                                                 |                                       |             |                        |             |                           |             |
| 0–2 PCEs by 0 ACEs                                                                                         | 1.00                                  | —           | 1.00                   | —           | 1.00                      | —           |
| 3–4 PCEs by 1–2 ACEs                                                                                       | 1.60                                  | (0.88–2.92) | 1.50                   | (0.82–2.74) | 1.445                     | (0.63–3.37) |
| 3–4 PCEs by 3+ ACEs                                                                                        | 2.16*                                 | (1.16–4.02) | 2.14*                  | (1.15–3.97) | 1.02                      | (0.45–2.33) |
| 5–6 PCEs by 1–2 ACEs                                                                                       | 2.20**                                | (1.24–3.88) | 1.96*                  | (1.11–3.47) | 2.77*                     | (1.23–6.22) |
| 5–6 PCEs by 3+ ACEs                                                                                        | 1.83                                  | (0.99–3.38) | 2.10*                  | (1.15–3.87) | 1.11                      | (0.49–2.55) |

Covariates in the treatment model included continuous age, sex, a 5-category race/ethnicity measure, educational attainment, health insurance, and income as measured by percentage of federal poverty level. Statistical significance is indicated at the 5% level: \*  $P < .05$ ; \*\*  $P < .01$ ; \*\*\*  $P < .001$ . Coef., coefficient. —, not applicable.

| <b>SUPPLEMENTAL TABLE 11</b> Unadjusted, Survey-Weighted Age at Diagnosis According to PCE and ACE Score: Percentiles |      |      |     |     |      |     |    |
|-----------------------------------------------------------------------------------------------------------------------|------|------|-----|-----|------|-----|----|
|                                                                                                                       |      | PCEs |     |     | ACEs |     |    |
|                                                                                                                       |      | 5–6  | 3–4 | 0–2 | 0    | 1–2 | 3+ |
| Any condition: Physical or psychiatric                                                                                | 25th | 40   | 35  | 30  | 43   | 39  | 32 |
|                                                                                                                       | 50th | 54   | 50  | 47  | 55   | 52  | 48 |
|                                                                                                                       | 75th | 66   | 64  | 61  | 66   | 65  | 62 |
| Any physical condition                                                                                                | 25th | 40   | 38  | 35  | 41   | 35  | 28 |
|                                                                                                                       | 50th | 55   | 50  | 50  | 55   | 50  | 44 |
|                                                                                                                       | 75th | 67   | 65  | 63  | 66   | 65  | 60 |
| Any psychiatric condition                                                                                             | 25th | 24   | 20  | 20  | 25   | 22  | 18 |
|                                                                                                                       | 50th | 32   | 33  | 31  | 35   | 32  | 28 |
|                                                                                                                       | 75th | 51   | 45  | 44  | 46   | 45  | 39 |
